# Supplementary material
Source: publisher site journal article supplement (https://www.dovepress.com/article/supplementary_file/605629/605629_Combined_Supplementary_Material_Kai_Cao_1.docx)
Supplement: Supplementary file 1 [file 605629_Combined_Supplementary_Material_Kai_Cao_1.docx]

**Supplementary Material**

Study title: CT-Guided Dorsal Root Ganglion Pulsed Radiofrequency Alone, With Ozone, or With Platelet-Rich Plasma for Postherpetic Neuralgia: A Randomized Controlled Trial

Authors: Kai Cao, Jie Wu, JiaLei Zhang

**Supplementary File 1. Completed CONSORT Checklist for Reporting Randomized Trials**

Manuscript title: CT-Guided Dorsal Root Ganglion Pulsed Radiofrequency Alone or With Ozone or Platelet-Rich Plasma for Postherpetic Neuralgia: A Randomized Controlled Trial

This checklist was completed according to the CONSORT reporting framework for randomized trials. Locations refer to the revised manuscript sections, tables, figures, and supplementary materials. Items marked “Not applicable” were not applicable to this trial design or conduct.

| **Section/Topic** | **Item No.** | **CONSORT checklist item** | **Location in revised manuscript** | **Status/notes** |
| --- | --- | --- | --- | --- |
| Title and Abstract | 1a | Identification as a randomized trial in the title. | Title page: “A Randomized Controlled Trial”. | Reported |
| Title and Abstract | 1b | Structured summary of trial design, methods, results, and conclusions. | Abstract: Background, Objective, Methods, Results, Conclusion, and Keywords. | Reported |
| Introduction | 2a | Scientific background and explanation of rationale. | Introduction: VZV/PHN background; current PHN management; rationale for PRF, ozone, and PRP. | Reported |
| Introduction | 2b | Specific objectives or hypotheses. | End of Introduction: 90-day efficacy and safety objective; primary and secondary hypotheses; exploratory NLR and safety assessment. | Reported |
| Methods | 3a | Description of trial design, including allocation ratio. | Methods—Study Design, Setting, and Ethics; Randomization and Masking: prospective single-center randomized controlled trial; 1:1:1 allocation to three intervention arms. | Reported |
| Methods | 3b | Important changes to methods after trial commencement, with reasons. | No important post-commencement methodological changes were described; no protocol amendments are reported. | Not applicable |
| Methods | 4a | Eligibility criteria for participants. | Methods—Participants and Eligibility Criteria: inclusion and exclusion criteria, PHN diagnostic criteria, ICD classification, and eligibility confirmation. | Reported |
| Methods | 4b | Settings and locations where data were collected. | Methods—Study Design, Setting, and Ethics: single pain-treatment center, Changzhi People’s Hospital Affiliated to Changzhi Medical College, Changzhi, China. | Reported |
| Methods | 5 | Interventions for each group with sufficient details to allow replication, including how and when they were actually administered. | Methods—Interventions: CT-guided DRG PRF protocol; PRF-alone, PRF plus ozone, and PRF plus PRP procedures; PRP preparation; conventional therapy; Supplementary Table S1. | Reported |
| Methods | 6a | Completely defined pre-specified primary and secondary outcome measures, including how and when they were assessed. | Methods—Outcomes and Follow-up: VAS primary endpoint; PSQI, SF-12, NLR, and safety outcomes; baseline, 30-day, 60-day, and 90-day assessments. | Reported |
| Methods | 6b | Any changes to trial outcomes after the trial commenced, with reasons. | No outcome changes after trial commencement were described; outcomes were prespecified in Methods. | Not applicable |
| Methods | 7a | How sample size was determined. | Methods—Sample Size: calculation based on VAS, expected difference of 1.2 points, SD of 1.8, α = 0.05, power = 80%, 10% anticipated dropout, 45 per group. | Reported |
| Methods | 7b | When applicable, explanation of any interim analyses and stopping guidelines. | No interim analyses or stopping guidelines were planned or reported; the trial completed the planned 90-day follow-up. | Not applicable |
| Methods | 8a | Method used to generate the random allocation sequence. | Methods—Randomization and Masking: independent statistician generated the computer-based random allocation sequence. | Reported |
| Methods | 8b | Type of randomization; details of any restriction such as blocking and block size. | Methods—Randomization and Masking: computer-generated randomization using blocks of three participants; no stratification. | Reported |
| Methods | 9 | Mechanism used to implement the random allocation sequence, describing steps taken to conceal the sequence until interventions were assigned. | Methods—Randomization and Masking: sequentially numbered, opaque, sealed envelopes prepared by an independent statistician and held by an independent coordinator. | Reported |
| Methods | 10 | Who generated the random allocation sequence, who enrolled participants, and who assigned participants to interventions. | Methods—Randomization and Masking: independent statistician generated sequence; allocation revealed after eligibility confirmation, written consent, and baseline assessment by study coordinator independent of recruitment and assessment. | Reported |
| Methods | 11a | If done, who was blinded after assignment to interventions and how. | Methods—Randomization and Masking: outcome assessors and statistician were masked; final dataset coded using anonymized group labels until database lock and primary analysis completion. | Reported |
| Methods | 11b | If relevant, description of the similarity of interventions. | Methods—Randomization and Masking: participant and treating-physician blinding was not feasible because the three procedural interventions differed; reasons are stated. | Reported |
| Methods | 12a | Statistical methods used to compare groups for primary and secondary outcomes. | Methods—Statistical Analysis: distribution testing; ANOVA/Kruskal–Wallis/chi-square/Fisher tests; linear mixed-effects models; Holm–Bonferroni adjustment; complete-case/per-protocol analysis. | Reported |
| Methods | 12b | Methods for additional analyses, such as subgroup analyses and adjusted analyses. | Methods—Statistical Analysis and Results—Clinical Relevance: Hedges’ g effect sizes, MCID-based interpretation, exploratory NLR interpretation, and safety summaries; no subgroup analysis reported. | Reported |
| Results | 13a | For each group, the numbers of participants who were randomly assigned, received intended treatment, and were analyzed for the primary outcome. | Results—Participant Flow and Analysis Population; Figure 1: 135 randomized, 45 per group; all received allocated intervention; 122 included in complete-case/per-protocol analysis. | Reported |
| Results | 13b | For each group, losses and exclusions after randomization, together with reasons. | Results—Participant Flow and Analysis Population; Figure 1: losses to follow-up and receipt of non-study treatments documented by treatment arm and reason. | Reported |
| Results | 14a | Dates defining the periods of recruitment and follow-up. | Abstract—Methods; Methods—Study Design, Setting, and Ethics; Results—Participant Flow: recruitment July to December 2025; 90-day follow-up after treatment. | Reported |
| Results | 14b | Why the trial ended or was stopped. | The trial was not reported as stopped early and completed the planned follow-up. | Not applicable |
| Results | 15 | A table showing baseline demographic and clinical characteristics for each group. | Results—Baseline Characteristics and PRP Quality Control; Table 1. | Reported |
| Results | 16 | For each group, number of participants included in each analysis and whether analysis was by original assigned groups. | Methods—Statistical Analysis and Results—Participant Flow and Analysis Population: complete-case/per-protocol set; all randomized participants summarized by assigned group; final analysis numbers 38, 43, and 41. | Reported |
| Results | 17a | For each primary and secondary outcome, results for each group, and estimated effect size and its precision. | Results—Longitudinal Outcomes; Tables 2–5: VAS, PSQI, SF-12, and NLR values; estimated mean differences, 95% CIs, adjusted P values, Hedges’ g. | Reported |
| Results | 17b | For binary outcomes, presentation of both absolute and relative effect sizes is recommended. | Safety outcomes are reported as event counts and percentages in Table 6; no binary primary efficacy outcome was specified. | Not applicable for efficacy outcomes; safety data reported |
| Results | 18 | Results of any other analyses performed, including subgroup analyses and adjusted analyses, distinguishing pre-specified from exploratory. | Results—Clinical Relevance and Graphical Presentation; Table 5: MCID and effect-size interpretation; exploratory NLR analysis. No subgroup analysis was reported. | Reported |
| Results | 19 | All important harms or unintended effects in each group. | Results—Adverse Events; Table 6: adverse events, serious adverse events, ozone-related and PRP-related complications, and management. | Reported |
| Discussion | 20 | Trial limitations, addressing sources of potential bias, imprecision, and multiplicity. | Discussion—Strengths and Limitations / Limitations paragraph: single-center setting, modest sample size, 90-day follow-up, complete-case/per-protocol analysis, lack of mechanistic biomarkers and cost-effectiveness evaluation. | Reported |
| Discussion | 21 | Generalizability or external validity of the trial findings. | Discussion—Clinical implications and Limitations: results interpreted as preliminary; larger multicenter trials needed; individualized clinical decision-making emphasized. | Reported |
| Discussion | 22 | Interpretation consistent with results, balancing benefits and harms, and considering other relevant evidence. | Discussion and Conclusion: PRF plus PRP associated with greater 90-day multidimensional improvement; safety interpreted cautiously; findings regarded as preliminary and requiring validation. | Reported |
| Other information | 23 | Registration number and name of trial registry. | Methods—Study Design, Setting, and Ethics; Trial Registration: Chinese Clinical Trial Registry, ChiCTR2500104555. | Reported |
| Other information | 24 | Where the full trial protocol can be accessed, if available. | Trial registration details are reported. A publicly accessible full protocol was not stated in the manuscript. | Not publicly available / not stated |
| Other information | 25 | Sources of funding and other support, and role of funders. | Funding statement: no external funding was obtained for study conduct, manuscript preparation, or publication. | Reported |

Abbreviations: CONSORT, Consolidated Standards of Reporting Trials; CT, computed tomography; DRG, dorsal root ganglion; MCID, minimal clinically important difference; NLR, neutrophil-to-lymphocyte ratio; PHN, postherpetic neuralgia; PRF, pulsed radiofrequency; PRP, platelet-rich plasma; PSQI, Pittsburgh Sleep Quality Index; SF-12, 12-Item Short Form Health Survey; VAS, Visual Analog Scale.

**Supplementary File: Procedural Checklist for Study Replication**

*A Randomized Controlled Trial Comparing Computed Tomography-Guided Dorsal Root Ganglion Pulsed Radiofrequency Alone, Combined with Ozone, or Combined with Platelet-Rich Plasma for Postherpetic Neuralgia*

**Supplementary Table S1. Procedural checklist for computed tomography-guided dorsal root ganglion pulsed radiofrequency with or without ozone or platelet-rich plasma**

| **Procedural step** | **Standardized description** |
| --- | --- |
| **Target selection** | Target segment was selected according to the painful dermatome, previous herpes zoster distribution, clinical sensory findings, and preprocedural imaging review. |
| **Patient position** | Patients were placed in the prone position on the computed tomography scanner table. |
| **Monitoring** | Electrocardiography, pulse oximetry, and noninvasive blood pressure monitoring were applied throughout the procedure; nasal cannula oxygen was administered when required. |
| **Aseptic preparation** | All procedures were performed in a dedicated computed tomography-guided procedure room under strict aseptic conditions, including routine skin disinfection, sterile draping, and local infiltration anesthesia. |
| **Target plane** | The target puncture plane was selected at the upper one-third of the corresponding intervertebral foramen. |
| **Needle** | A 22-gauge radiofrequency needle with a 10-mm exposed tip was used. |
| **Needle advancement** | The needle was advanced under real-time computed tomography guidance toward the posterior aspect of the upper one-third of the intervertebral foramen, with needle depth not exceeding one-half of the ipsilateral vertebral body. |
| **Needle-tip confirmation** | Needle direction and depth were adjusted according to repeated computed tomography scans. Three-dimensional computed tomography reconstruction was used to confirm the needle tip near the dorsal root ganglion target area within the intervertebral foramen. |
| **Safety confirmation** | Negative aspiration for blood, air, and cerebrospinal fluid was confirmed before radiofrequency testing or injection. |
| **Contrast confirmation** | A total of 0.5 mL contrast medium was injected, followed by repeat computed tomography scanning to confirm appropriate perineural distribution and exclude intravascular or unintended spread. |
| **Impedance** | Impedance was maintained within 250-550 ohms. |
| **Sensory stimulation** | Sensory stimulation was performed at 50 Hz and 0.5 V. |
| **Motor stimulation** | Motor stimulation was performed at 2 Hz and 0.5 V. |
| **Localization threshold** | Correct localization was confirmed when paresthesia corresponding to the original painful dermatome or an appropriate segmental motor response was elicited at a stimulation threshold of <0.5 mA. |
| **Pulsed radiofrequency parameters** | Pulsed radiofrequency was performed using the following parameters: frequency, 2 Hz; pulse width, 20 ms; temperature, 42°C; and duration, 300 s. |
| **Procedural endpoint** | The endpoint was defined as hypoesthesia, numbness, or disappearance of allodynia in the original painful area. If intolerable pain occurred during needle advancement or stimulation, the needle position was adjusted before continuation. |
| **PRF-alone group** | Computed tomography-guided dorsal root ganglion pulsed radiofrequency was performed only; no additional injectate was administered after pulsed radiofrequency. |
| **PRF plus ozone group** | After pulsed radiofrequency and confirmation of negative aspiration, 3 mL per segment of medical ozone at 30 microgram/mL was slowly injected into the target dorsal root ganglion region under computed tomography guidance. Repeat computed tomography scanning was performed to confirm local diffusion and exclude unintended spread. |
| **PRF plus PRP group** | After pulsed radiofrequency and confirmation of correct needle position and negative aspiration, approximately 3 mL freshly prepared autologous platelet-rich plasma was slowly injected perineurally around the dorsal root ganglion within the intervertebral foramen under computed tomography guidance. Repeat computed tomography scanning was performed to confirm that the needle tip remained at the intended target position and to exclude obvious ectopic distribution or procedure-related complications. |
| **PRP preparation** | Peripheral venous blood (20 mL) was collected from the cubital vein into sterile tubes containing 3 mL sodium citrate anticoagulant. The sample was processed at 18°C-26°C with a centrifuge rotor radius of 10 cm. A two-step centrifugation protocol was used: 1,500 rpm for 10 min (approximately 252 x g), followed by 3,500 rpm for 8 min (approximately 1,370 x g). |
| **PRP quality control** | Platelet counts were measured to confirm enrichment. The final platelet concentration was maintained at 500-1300 x 10^9/L, approximately 4-5 times the baseline peripheral blood platelet concentration; residual red blood cell concentration was <=0.01 x 10^6/mL. |
| **PRP activation** | The prepared platelet-rich plasma was used immediately and was not activated ex vivo with bovine thrombin, calcium chloride, or other exogenous activating agents. Activation was expected to occur in situ after injection through contact with local collagen and tissue factors. |
| **Post-procedure care** | After completion of the assigned intervention, the needle was removed, local compression hemostasis was applied, and the puncture site was covered with a sterile dressing. Patients were observed for 30 min before return to the ward if no immediate adverse events occurred. |

**Note:** This procedural checklist is provided to facilitate replication of the intervention protocol without inclusion of patient-level procedural images. All procedures were performed by experienced pain physicians under computed tomography guidance and strict aseptic conditions.

**Abbreviations:** CT, computed tomography; DRG, dorsal root ganglion; PRF, pulsed radiofrequency; PRP, platelet-rich plasma.

**Supplementary Table S2. Reliability and validity of outcome measures used in the study**

This supplementary table summarizes the measurement domain, reliability, validity, and application of each outcome measure used in the randomized controlled trial.

| **Outcome measure** | **Measurement domain** | **Reliability and validity** | **Application in the present study** |
| --- | --- | --- | --- |
| Visual Analog Scale (VAS) | Pain intensity | Widely used and responsive pain-intensity measure in clinical pain research. The Chinese 10-cm VAS has demonstrated satisfactory reliability and convergent validity for pain assessment. | Primary efficacy outcome. Patients marked pain intensity on a 10-cm horizontal line anchored at 0 (no pain) and 10 (worst imaginable pain) at baseline and 30, 60, and 90 days after treatment. |
| Pittsburgh Sleep Quality Index (PSQI) | Sleep quality | Standardized self-report sleep questionnaire. The Chinese version has shown acceptable internal consistency, stable factor structure, and good screening performance, including previously reported sensitivity of 89.5% and specificity of 86.5%. | Secondary outcome for sleep disturbance related to postherpetic neuralgia. Total scores range from 0 to 21, with lower scores indicating better sleep quality. |
| 12-Item Short Form Health Survey (SF-12) | Health-related quality of life | Concise health-related quality-of-life instrument assessing physical and mental health domains. The Chinese version has demonstrated satisfactory internal consistency, construct validity, convergent validity, discriminant validity, and criterion validity. | Secondary outcome assessing broader physical and psychological health effects beyond pain intensity. Scores were converted to a 0-100 scale, with higher scores indicating better health-related quality of life. |
| Neutrophil-to-lymphocyte ratio (NLR) | Systemic inflammatory status | Objective laboratory-derived marker calculated from routine peripheral blood counts. It reflects the balance between neutrophil-mediated inflammatory activation and lymphocyte-mediated immune regulation. | Exploratory inflammatory outcome to examine whether systemic inflammatory changes paralleled improvements in pain, sleep quality, and health-related quality of life. |
| Adverse events | Safety | Prespecified adverse-event categories and standard serious-adverse-event definitions were used to improve consistency and validity of safety reporting. Events were reviewed from procedural records, post-procedural observation notes, and follow-up records. | Safety outcome during the procedure, immediate post-procedural observation, and follow-up at 30, 60, and 90 days. Events were summarized by treatment group. |

**Note:** VAS, PSQI, SF-12, and NLR were assessed at baseline and at 30, 60, and 90 days after treatment by outcome assessors blinded to treatment allocation. VAS, Visual Analog Scale; PSQI, Pittsburgh Sleep Quality Index; SF-12, 12-Item Short Form Health Survey; NLR, neutrophil-to-lymphocyte ratio.
